# Supplementary material for: Effect of Supplemental Oxygen on von Willebrand Factor Activity and Ristocetin Cofactor Activity in Patients at Risk for Cardiovascular Complications Undergoing Moderate-to High-Risk Major Noncardiac Surgery—A Secondary Analysis of a Randomized Trial
Source: MDPI journal article supplement (doi:10.3390/jcm12031222), 2023-02-03
Supplement: s1 [file s1]

**Supplementary Online Content**

**Table S1.** Univariable regression model Ristocetin

**Table S2.** Multivariable regression model Ristocetin

This supplementary material has been provided by the authors to give readers additional information about their work.

**Table S1: Univariable regression model Ristocetin**

| Variable                      | Comparison                | Effect   | lower CL | upper CL | p-value |
|-------------------------------|---------------------------|----------|----------|----------|---------|
| <i>Time</i>                   | Overall Trend Test        | 26.969   | 22.954   | 30.984   | <0.001  |
|                               | pre vs. post 2h           | -85.794  | -99.489  | -72.100  | <0.001  |
|                               | pre vs. POD 1             | -97.980  | -112.800 | -83.157  | <0.001  |
|                               | pre vs. POD 3             | -110.390 | -125.590 | -95.185  | <0.001  |
| <i>Time x Group</i>           | Overall Trend Test        | 1.003    | 20.500   | 32.528   | 0.818   |
|                               | Group 30% vs. 80% pre     | -7.009   | -32.518  | 18.500   | 0.590   |
|                               | Group 30% vs. 80% 2h post | 14.243   | -13.215  | 41.700   | 0.309   |
|                               | Group 30% vs. 80% POD 1   | -21.596  | -51.396  | 8.205    | 0.155   |
|                               | Group 30% vs. 80% POD 3   | -21.260  | -51.465  | 8.946    | 0.167   |
|                               | Group 30% pre vs. 2h post | -96.485  | -115.860 | -77.105  | <0.001  |
|                               | Group 30% pre vs. POD 1   | -90.103  | -111.470 | -68.733  | <0.001  |
|                               | Group 30% pre vs. POD 3   | -116.940 | -138.670 | -95.222  | <0.001  |
|                               | Group 80% pre vs. 2h post | -75.233  | -94.494  | -55.972  | <0.001  |
|                               | Group 80% pre vs. POD 1   | -104.690 | -125.180 | -84.203  | <0.001  |
|                               | Group 80% pre vs. POD 3   | -104.350 | -125.540 | -83.163  | <0.001  |
| <i>Type of surgery</i>        | Laparoscopic vs. Open     | -46.450  | -68.040  | -24.860  | <0.001  |
| <i>Time x Type of surgery</i> | Overall Trend Test        | -1.643   | -10.117  | 6.832    | 0.704   |
| <i>Liver</i>                  | Yes vs. No                | 7.732    | -26.191  | 41.654   | 0.654   |
| <i>Colorectal</i>             | Yes vs. No                | 1.187    | -24.375  | 26.750   | 0.927   |
| <i>Pancreatic</i>             | Yes vs. No                | 50.437   | 22.120   | 78.755   | <0.001  |
| <i>Renal</i>                  | Yes vs. No                | -42.086  | -69.177  | -14.995  | 0.003   |
| <i>Prostatectomy</i>          | Yes vs. No                | -25.053  | -56.165  | 6.060    | 0.114   |
| <i>Cystectomy</i>             | Yes vs. No                | 5.792    | -29.658  | 41.241   | 0.748   |

|                                             |                 |         |          |         |        |
|---------------------------------------------|-----------------|---------|----------|---------|--------|
| <i>Gynaecological</i>                       | Yes vs No.      | 44.646  | -7.929   | 97.221  | 0.096  |
| <i>Other</i>                                | Yes vs No.      | -9.827  | -43.576  | 23.923  | 0.567  |
| <i>Age</i>                                  |                 | 1.674   | 0.279    | 3.068   | 0.019  |
| <i>BMI</i>                                  |                 | -0.260  | -2.440   | 1.919   | 0.814  |
| <i>Sex</i>                                  | Female vs. Male | 25.548  | 2.931    | 48.164  | 0.027  |
| <i>ASA</i>                                  | 3,4 vs. 1,2     | 20.331  | -2.855   | 43.517  | 0.085  |
| <i>History of Coronary Artery Disease</i>   | Yes vs. No      | 0.2205  | -24.918  | 25.359  | 0.986  |
| <i>History of Peripheral Artery Disease</i> | Yes vs. No      | 47.752  | 19.162   | 76.342  | 0.001  |
| <i>History of stroke</i>                    | Yes vs. No      | 12.031  | -27.374  | 51.435  | 0.548  |
| <i>History of Heart failure</i>             | Yes vs. No      | -12.321 | -54.938  | 30.296  | 0.570  |
| <i>Diabetes</i>                             | Yes vs. No      | -1.291  | -25.354  | 22.773  | 0.916  |
| <i>History of Hypertension</i>              | Yes vs. No      | -67.306 | -106.880 | -27.732 | 0.001  |
| <i>Blood type</i>                           | 0 vs A, B, AB   | 46.111  | 23.804   | 68.418  | <0.001 |
| <i>pre ADAMTS</i>                           |                 | -0.024  | -0.141   | 0.092   | 0.679  |

**Table S1.** The estimated effect sizes, confidence levels (CL) and *p*-values were calculated using univariable regression models. pre, preoperative; 2 h post, within two hours after surgery; POD, postoperative day

**Table S2: Multivariable regression model Ristocetin**

| Variable                                    | Comparison           | Effect   | lower CL | upper CL | p-value |
|---------------------------------------------|----------------------|----------|----------|----------|---------|
| <i>Time</i>                                 | pre vs. 2h post      | -85.774  | -99.513  | -72.035  | <0.001  |
|                                             | pre vs. POD 1        | -95.391  | -110.220 | -80.559  | <0.001  |
|                                             | pre vs. POD 3        | -108.000 | -123.240 | -92.771  | <0.001  |
| <i>Type of surgery</i>                      | Laparoscopic vs Open | -38.570  | -60.868  | -16.273  | <0.001  |
| <i>Age</i>                                  |                      | 2.087    | 0.808    | 3.366    | 0.002   |
| <i>Sex</i>                                  | Female vs. Male      | 28.671   | 8.148    | 49.194   | 0.006   |
| <i>History of Peripheral Artery Disease</i> | Yes vs. No           | 39.979   | 13.043   | 66.915   | 0.004   |
| <i>History of Hypertension</i>              | Yes vs. No           | -64.034  | -102.010 | -26.056  | 0.001   |
| <i>Blood type</i>                           | 0 vs A, B, AB        | 43.726   | 23.585   | 63.867   | <0.001  |
| <i>Pancreatic surgery</i>                   | Yes vs. No           | 19.136   | -8.436   | 46.708   | 0.173   |
| <i>Renal surgery</i>                        | Yes vs. No           | -10.750  | -38.968  | 17.469   | 0.454   |

**Table S2.** The estimated effect sizes, confidence levels (CL) and *p*-values were calculated using multivariable regression models (with random factor patient). pre, preoperative; 2 h post, within two hours after surgery; POD, postoperative day
